# Supplementary material for: In vitro anticancer activity of methanolic extract of Granulocystopsis sp., a microalgae from an oligotrophic oasis in the Chihuahuan desert
Source: PeerJ. 2020 Mar 12;8:e8686. doi: 10.7717/peerj.8686 (PMC7073244; doi:10.7717/peerj.8686)
Supplement: Supplemental Information 1 [file peerj-08-8686-s001.xlsx]

## Sheet: Hoja1
1
viability	t0	t0	t0	Blank	Cell+PBS		viability	t12	T12	T12	Blank	Cell+PBS
Blank + extract	0.052	0.055	0.055				Blank + extract	0.054	0.052	0.052
Repetition 1	0.556	0.564	0.551	0.051	0.548		Repetition 1	0.524	0.514	0.533	0.053	0.574
Repetition 2	0.572	0.522	0.516	0.052	0.577		Repetition 2	0.488	0.538	0.508	0.055	0.558
Repetition 3	0.527	0.548	0.574	0.05	0.531		Repetition 3	0.491	0.501	0.51	0.055	0.561
Mean	0.551667	0.544667	0.547	0.051	0.552		Mean	0.501	0.517667	0.517	0.0543333	0.564333
% viability	99.7339	97.7379	98.2036				% viability	87.6471	91.3072	91.1765
viability	t24	t24	t24	Blank	Cell+PBS		viability	t36	t36	t36	Blank	Cell+PBS
Blank + extract	0.053	0.051	0.053				Blank + extract	0.065	0.074	0.065
Repetition 1	0.424	0.419	0.434	0.051	0.486		Repetition 1	0.326	0.307	0.308	0.059	0.597
Repetition 2	0.416	0.431	0.445	0.05	0.499		Repetition 2	0.321	0.312	0.279	0.056	0.471
Repetition 3	0.411	0.434	0.435	0.052	0.515		Repetition 3	0.236	0.292	0.277	0.061	0.479
Mean	0.417	0.428	0.438	0.051	0.5		Mean	0.294333	0.303667	0.288	0.0586667	0.515667
% viability	81.069	83.9644	85.7461				% viability	50.1823	50.2553	48.7965
viability	t48	t48	t48	Blank	Cell+PBS		viability	t60	t60	t60	Blank	Cell+PBS
Blank + extract	0.06	0.069	0.071				Blank + extract	0.061	0.049	0.056
Repetition 1	0.261	0.244	0.293	0.057	0.569		Repetition 1	0.606	0.509	0.459	0.055	0.905
Repetition 2	0.269	0.286	0.27	0.053	0.519		Repetition 2	0.448	0.426	0.471	0.054	0.99
Repetition 3	0.238	0.252	0.248	0.055	0.461		Repetition 3	0.402	0.408	0.445	0.052	0.767
Mean	0.256	0.260667	0.270333	0.055	0.516333		Mean	0.485333	0.447667	0.458333	0.0536667	0.887333
% viability	42.4855	41.5462	43.2081				% viability	50.8996	47.8209	48.2607
viability	t72	t72	t72	Blank	Cell+PBS
Blank + extract	0.049	0.052	0.059
Repetition 1	0.66	0.395	0.437	0.051	0.825
Repetition 2	0.355	0.458	0.408	0.05	1.032
Repetition 3	0.344	0.398	0.464	0.051	0.83
Mean	0.453	0.417	0.436333	0.0506667	0.895667
% viability	47.8107	43.1953	44.6548
