# Supplementary material for: In vitro anticancer activity of methanolic extract of Granulocystopsis sp., a microalgae from an oligotrophic oasis in the Chihuahuan desert
Source: PeerJ. 2020 Mar 12;8:e8686. doi: 10.7717/peerj.8686 (PMC7073244; doi:10.7717/peerj.8686)
Supplement: Supplemental Information 3 [file peerj-08-8686-s003.xlsx]

## Sheet: Hoja1
Viability	t0	t0	t0	Blank	Cell+PBS		Viability	t12	T12	T12	Blank	Cell+PBS
Blank + extract	0.087	0.097	0.1				Blank + extract	0.1	0.091	0.085
Repetition 1	1.853	2.031	1.909	0.103	2.041		Repetition 1	1.289	1.269	1.242	0.099	1.354
Repetition 2	1.735	1.889	1.886	0.087	1.742		Repetition 2	1.227	1.186	1.148	0.085	1.423
Repetition 3	1.953	1.81	2.039	0.099	1.93		Repetition 3	1.234	1.262	1.183	0.104	1.499
Mean	1.847	1.91	1.94467	0.0963333	1.90433		Mean	1.25	1.239	1.191	0.096	1.42533
% Viability	97.3451	100.277	102.028				% Viability	86.5095	86.3591	83.1996
Viability	t24	t24	t24	Blank	Cell+PBS		Viability	t36	t36	t36	Blank	Cell+PBS
Blank + extract	0.09	0.09	0.105				Blank + extract	0.115	0.135	0.132
Repetition 1	1.564	1.531	1.459	0.09	1.964		Repetition 1	0.981	1.297	1.246	0.087	1.996
Repetition 2	1.457	1.352	1.401	0.086	1.857		Repetition 2	0.986	1.304	1.322	0.105	2.035
Repetition 3	1.423	1.323	1.592	0.1	1.823		Repetition 3	0.937	1.196	1.195	0.115	1.937
Mean	1.48133	1.402	1.484	0.092	1.88133		Mean	0.968	1.26567	1.25433	0.102333	1.98933
% Viability	77.7571	73.3234	77.0678				% Viability	45.204	59.9187	59.4771
Viability	t48	t48	t48	Blank	Cell+PBS		Viability	t60	t60	t60	Blank	Cell+PBS
Blank + extract	0.117	0.119	0.118				Blank + extract	0.092	0.101	0.094
Repetition 1	1.026	1.11	1.001	0.093	2.587		Repetition 1	1.655	1.604	1.532	0.099	3.218
Repetition 2	0.938	1.088	0.904	0.095	2.077		Repetition 2	1.323	1.343	1.502	0.091	3.033
Repetition 3	0.962	1.015	0.879	0.099	2.059		Repetition 3	1.464	1.292	1.498	0.105	2.969
Mean	0.975333	1.071	0.928	0.0956667	2.241		Mean	1.48067	1.413	1.51067	0.0983333	3.07333
% Viability	40.0093	44.3754	37.7564				% Viability	46.6779	44.1008	47.619
Viability	t72	t72	t72	Blank	Cell+PBS
Blank + extract	0.094	0.102	0.099
Repetition 1	1.822	1.726	1.444	0.108	3.183
Repetition 2	1.752	1.521	1.953	0.097	3.342
Repetition 3	1.651	1.651	1.765	0.092	2.842
Mean	1.74167	1.63267	1.72067	0.099	3.12233
% Viability	54.4983	50.6284	53.6384
