# Supplementary material for: In vitro anticancer activity of methanolic extract of Granulocystopsis sp., a microalgae from an oligotrophic oasis in the Chihuahuan desert
Source: PeerJ. 2020 Mar 12;8:e8686. doi: 10.7717/peerj.8686 (PMC7073244; doi:10.7717/peerj.8686)
Supplement: Supplemental Information 5 [file peerj-08-8686-s005.xlsx]

## Sheet: Hoja1
1
viability	t0	t0	t0	Blank	Cell+PBS		viability	t12	T12	T12	Blank	Cell+PBS
Blank + extract	0.105	0.104	0.108				Blank + extract	0.114	0.106	0.117
Repetition 1	2.836	2.786	2.694	0.11	2.836		Repetition 1	3.128	3.077	2.945	0.139	3.224
Repetition 2	2.787	2.719	2.777	0.101	2.787		Repetition 2	2.928	2.82	2.888	0.095	2.972
Repetition 3	2.734	2.805	2.79	0.112	2.734		Repetition 3	2.962	2.832	2.764	0.088	2.803
Mean	2.78567	2.77	2.75367	0.107667	2.78567		Mean	3.006	2.90967	2.86567	0.107333	2.99967
% viability	100.1	99.5519	98.7926				% viability	99.9885	96.9344	95.0328
viability	t24	t24	t24	Blank	Cell+PBS		viability	t36	t36	t36	Blank	Cell+PBS
Blank + extract	0.11	0.106	0.103				Blank + extract	0.121	0.121	0.13
Repetition 1	2.537	2.784	2.601	0.096	2.937		Repetition 1	2.971	2.886	2.857	0.097	3.417
Repetition 2	2.659	2.541	2.69	0.101	2.859		Repetition 2	2.879	2.991	2.997	0.115	3.554
Repetition 3	2.831	2.665	2.735	0.111	2.831		Repetition 3	2.763	2.918	2.814	0.107	3.456
Mean	2.67567	2.66333	2.67533	0.102667	2.87567		Mean	2.871	2.93167	2.88933	0.106333	3.47567
% viability	92.5231	92.2226	92.7636				% viability	81.6185	83.4191	81.8955
viability	t48	t48	t48	Blank	Cell+PBS		viability	t60	t60	t60	Blank	Cell+PBS
Blank + extract	0.116	0.122	0.124				Blank + extract	0.095	0.096	0.091
Repetition 1	2.184	2.159	2.147	0.095	2.841		Repetition 1	3.139	3.012	3.212	0.09	3.043
Repetition 2	2.196	2.131	2.077	0.095	2.988		Repetition 2	2.91	3.013	3.083	0.086	3.068
Repetition 3	2.227	2.148	2.103	0.099	2.87		Repetition 3	2.883	3.154	2.993	0.092	3.157
Mean	2.20233	2.146	2.109	0.0963333	2.89967		Mean	2.97733	3.05967	3.096	0.0893333	3.08933
% viability	74.4233	72.1998	70.8086				% viability	96.0778	98.7889	100.167
viability	t72	t72	t72	Blank	Cell+PBS
Blank + extract	0.092	0.084	0.107
Repetition 1	3.279	3.802	3.321	0.108	3.269
Repetition 2	3.53	2.959	3.411	0.084	3.435
Repetition 3	3.431	2.889	3.408	0.097	3.627
Mean	3.41333	3.21667	3.38	0.0963333	3.44367
% viability	99.2233	93.5869	97.7793
