# Supplementary material for: In vitro anticancer activity of methanolic extract of Granulocystopsis sp., a microalgae from an oligotrophic oasis in the Chihuahuan desert
Source: PeerJ. 2020 Mar 12;8:e8686. doi: 10.7717/peerj.8686 (PMC7073244; doi:10.7717/peerj.8686)
Supplement: Supplemental Information 6 [file peerj-08-8686-s006.xlsx]

## Sheet: Hoja1
Cell line		Rep 1	Rep 2	Rep 3	Mean	%	% Mean
Colon									Cell line	Assay 1	Assay 2	Assay 3	Mean	Dev. Std	Error std	IC α=0.05	Grups
Assay 1	Treatment	280	124	138	180.667	50	43.5689		Colon	50	41.2352	39.4714	43.5689	5.63892	3.25563	9.50644
	Control	501	375	208	361.333				Melanoma	33.6876	41.3644	42.6846	39.2455	4.85837	2.80498	8.19055
									Breast	32.839	37.6471	32.342	34.276	2.92996	1.69162	4.93952
Assay 2	Treatment	100	170	184	151.333	41.2352			Prostate	33.8462	34.1	41.5094	36.4852	4.35297	2.51319	7.33851
	Control	263	383	455	367				Vero	68.0908	80.028	71.25	73.1229	6.18509	3.57096	10.4272
									0	0	0	0	0	0	0	0
Assay 3	Treatment	99	176	173	149.333	39.4714
	Control	420	481	234	378.333
Melanoma
Assay 1	Treatment	111	68	138	105.667	33.6876	39.2455
	Control	257	320	364	313.667
Assay 2	Treatment	120	154	205	159.667	41.3644
	Control	368	392	398	386
Assay 3	Treatment	56	113	149	106	42.6846
	Control	120	322	303	248.333
Breast
Assay 1	Treatment	63	45	47	51.6667	32.839	34.276
	Control	164	195	113	157.333
Assay 2	Treatment	59	65	36	53.3333	37.6471
	Control	144	156	125	141.667
Assay 3	Treatment	42	58	74	58	32.342
	Control	255	106	177	179.333
Prostate
Assay 1	Treatment	137	171	110	139.333	33.8462	36.4852
	Control	374	421	440	411.667
Assay 2	Treatment	108	151	82	113.667	34.1
	Control	437	342	221	333.333
Assay 3	Treatment	185	211	132	176	41.5094
	Control	425	586	261	424
Vero
Assay 1	Treatment	894	421	215	510	68.0908	73.1229
	Control	1052	570	625	749
Assay 2	Treatment	631	272	239	380.667	80.028
	Control	834	334	259	475.667
Assay 3	Treatment	649	249	299	399	71.25
	Control	852	565	263	560

## Sheet: Hoja2
	Colon			Breast			prostate			melanoma			vero
	Control	Treatment		Control	Treatment		Control	Treatment		Control	Treatment		Control	Treatment
	361.333	180.667		157.333	51.6667		411.667	139.333		313.667	105.667		749	510
	367	151.333		141.667	53.3333		333.333	113.667		386	159.667		475.667	380.667
	378.333	149.333		179.333	58		424	176		248.333	106		560	399
Mean	368.889	160.444		159.444	54.3333		389.667	143		316	123.778		594.889	429.889
dev	8.65598	17.5415		18.9219	3.28295		49.1743	31.328		68.863	31.0811		139.967	69.9812
