# Supplementary material for: In vitro anticancer activity of methanolic extract of Granulocystopsis sp., a microalgae from an oligotrophic oasis in the Chihuahuan desert
Source: PeerJ. 2020 Mar 12;8:e8686. doi: 10.7717/peerj.8686 (PMC7073244; doi:10.7717/peerj.8686)
Supplement: Supplemental Information 7 [file peerj-08-8686-s007.xlsx]

## Sheet: GENERAL
			CONTROL				CHU 2 EXTRACT					DOXO
	LIVE	EA	LA	NEC		LIVE	EA	LA	NEC		LIVE	EA	LA	NEC
Rep#1	80.137	13.6986	3.42466	2.73973		33.6957	45.6522	17.029	3.62319		27.027	34.0541	34.0541	4.86486
Rep#2	87.6404	4.49438	0	0		41.9162	40.7186	10.7784	6.58683		21.9608	36.8627	37.6471	3.52941
Rep#3	80	13.3333	1.81818	4.84848		35.6557	43.0328	18.0328	3.27869		17.0732	63.4146	12.1951	7.31707
Mean	82.5925	10.5088	1.74761	2.5294		37.0892	43.1345	15.2801	4.49623		22.0203	44.7771	27.9654	5.23712
Dev std	4.37221	5.21182	1.71342	2.43108		4.29363	2.46838	3.9307	1.81868		4.9772	16.2015	13.7751	1.92107

## Sheet: Melanoma Ctrl
Melanoma Control	Live	Early Apoptosis	Late Apoptosis	Necrosis	total
1	22	1	0	0	23
2	12	7	0	0	19
3	17	2	0	0	19
4	21	3	5	4	33
5	20	3	0	0	23
6	25	4	0	0	29
Total	117	20	5	4	146
%	80.137	13.6986	3.42466	2.73973	100
7	9	6	0	0	15
8	52	5	0	0	57
9	51	8	0	0	59
10	33	6	0	0	39
10	42	5	0	0	47
12	47	3	0	0	50
Total	234	33	0	0	267
%	87.6404	4.49438	0	0	100
13	22	2	0	1	25
14	22	2	0	0	24
15	21	2	3	3	29
16	16	3	0	4	23
17	25	9	0	0	34
18	26	4	0	0	30
Total	132	22	3	8	165
%	80	13.3333	1.81818	4.84848	100

## Sheet: Melanoma Chu2
Melanoma CHU2 Extract	LIVE	EARLY APOPTOSIS	LATE APOPTOSIS	Necrosis	total
1	12	16	8	2	38
2	20	9	6	1	36
3	15	11	2	1	29
4	4	12	11	1	28
5	14	27	10	2	53
6	28	51	10	3	92
Total	93	126	47	10	276
%	33.6957	45.6522	17.029	3.62319	100
7	13	11	3	2	29
8	8	26	6	2	42
9	13	10	3	0	26
10	16	12	2	3	33
11	20	9	4	4	37
Total	70	68	18	11	167
%	41.9162	40.7186	10.7784	6.58683	100
12	10	13	10	1	34
13	18	15	13	0	46
14	21	14	5	3	43
15	9	1	6	1	17
16	13	29	4	1	47
17	16	33	6	2	57
Total	87	105	44	8	244
%	35.6557	43.0328	18.0328	3.27869	100

## Sheet: Melanoma Doxo
MELANOMA DOXORRUBICIN	LIVE	EARLY APOPTOSIS	LATE APOPTOSIS	Necrosis	total
1	10	3	1	3	17
2	4	11	14	1	30
3	6	15	21	1	43
4	12	20	9	1	42
5	13	9	10	3	35
6	5	5	8	0	18
Total	50	63	63	9	185
%	27.027	34.0541	34.0541	4.86486	100
7	10	19	17	4	50
8	6	25	16	3	50
9	8	18	10	0	36
10	14	18	22	2	56
11	6	5	12	0	23
12	12	9	19	0	40
Total	56	94	96	9	255
%	21.9608	36.8627	37.6471	3.52941	100
13	2	5	0	0	7
14	0	7	1	0	8
15	2	3	1	0	6
16	0	4	1	0	5
17	1	3	0	2	6
18	2	4	2	1	9
Total	7	26	5	3	41
%	17.0732	63.4146	12.1951	7.31707	100
