# Supplementary material for: In vitro anticancer activity of methanolic extract of Granulocystopsis sp., a microalgae from an oligotrophic oasis in the Chihuahuan desert
Source: PeerJ. 2020 Mar 12;8:e8686. doi: 10.7717/peerj.8686 (PMC7073244; doi:10.7717/peerj.8686)
Supplement: Supplemental Information 9 [file peerj-08-8686-s009.xlsx]

## Sheet: Hoja1
	Untreatment				Treatment Chu2 extract				Doxorubicin
Vero	586	544	540		542	612	559		743	750	752
Prostate	552	544	628		898	851	845		985	836	890
Melanoma	592	556	501		845	833	931		963	888	903
Colon	601	533	553		701	793	753		721	833	835
Breast	512	616	571		845	833	891		963	788	993
Control Posit	500	496	477		993	887	898
