# Supplementary material for: In vitro anticancer activity of methanolic extract of Granulocystopsis sp., a microalgae from an oligotrophic oasis in the Chihuahuan desert
Source: PeerJ. 2020 Mar 12;8:e8686. doi: 10.7717/peerj.8686 (PMC7073244; doi:10.7717/peerj.8686)
Supplement: Supplemental Information 11 [file peerj-08-8686-s011.xlsx]

## Sheet: General
	% mortality	100	50	20	2																			% viability	100	50	20	2
Lung_CHU2																							Lung_CHU2
	Assay 1	30.7179	30.5022	26.2298	29.1055																			Assay 1	69.2821	69.4978	73.7702	70.8945
	Assay 2	41.303	34.8874	46.0052	21.6776																			Assay 2	58.697	65.1126	53.9948	78.3224
	Assay 3	31.5932	25.4275	18.9919	-2.11521																			Assay 3	68.4068	74.5725	81.0081	102.115
	Assay 4																							Assay 4
	Assay 5																							Assay 5
	Mean	34.538	30.2724	30.409	16.2226																			Mean	65.462	69.7276	69.591	83.7774
	Dev. Std.	5.875	4.73413	13.9831	16.3095	0	0	0	0	0														Dev. Std.	5.875	4.73413	13.9831	16.3095	0	0	0	0	0
	Error Std	3.39193	2.73325	8.07317	9.41631	0	0	0	0	0														Error Std	3.39193	2.73325	8.07317	9.41631	0	0	0	0	0
	% mortality	100	50	20	2																			% viability	100	50	20	2
Lung-tulu4																							Lung-tulu4
	Assay 1	39.7145	29.6395	35.36	11.0712																			Assay 1	60.2855	70.3605	64.64	88.9288
	Assay 2	44.74	35.3457	47.0612	12.901																			Assay 2	55.26	64.6543	52.9388	87.099
	Assay 3	36.7124	44.1382	19.2507	-10.9586																			Assay 3	63.2876	55.8618	80.7493	110.959
	Assay 4																							Assay 4
	Assay 5																							Assay 5
	Mean	40.389	36.3745	33.8906	4.33785																			Mean	59.611	63.6255	66.1094	95.6621
	Dev. Std.	4.05606	7.30387	13.9634	13.2787	0	0	0	0	0														Dev. Std.	4.05606	7.30387	13.9634	13.2787	0	0	0	0	0
	Error Std	2.34177	4.21689	8.06174	7.66644	0	0	0	0	0														Error Std	2.34177	4.21689	8.06174	7.66644	0	0	0	0	0
	% mortality	100	50	20	2																			% viability	100	50	20	2
vero chu2																							vero chu2
	Assay 1	-5.62892	-1.11907	-3.42435	-5.49463																			Assay 1	105.629	101.119	103.424	105.495
	Assay 2	6.33381	0.795814	1.78786	1.65704																			Assay 2	93.6662	99.2042	98.2121	98.343
	Assay 3	15.4616	12.4781	10.6511	1.12731																			Assay 3	84.5384	87.5219	89.3489	98.8727
	Assay 4																							Assay 4
	Assay 5																							Assay 5
	Mean	5.38883	4.05163	3.00487	-0.903428																			Mean	94.6112	95.9484	96.9951	100.903
	Dev. Std.	10.577	7.36011	7.11622	3.98491	0	0	0	0	0														Dev. Std.	10.577	7.36011	7.11622	3.98491	0	0	0	0	0
	Error Std	6.10662	4.24936	4.10855	2.30069	0	0	0	0	0														Error Std	6.10662	4.24936	4.10855	2.30069	0	0	0	0	0
	% mortality	100	50	20	2																			% viability	100	50	20	2
vero-tulu4																							vero-tulu4
	Assay 1	-9.27708	-5.18129	-6.07654	-11.1907																			Assay 1	109.277	105.181	106.077	111.191
	Assay 2	6.2902	4.98201	-4.15349	-5.81053																			Assay 2	93.7098	95.018	104.153	105.811
	Assay 3	14.5481	13.7804	4.41205	-5.81147																			Assay 3	85.4519	86.2196	95.5879	105.811
	Assay 4																							Assay 4
	Assay 5																							Assay 5
	Mean	3.85374	4.52703	-1.93933	-7.60423																			Mean	96.1463	95.473	101.939	107.604
	Dev. Std.	12.098	9.48901	5.58387	3.10597	0	0	0	0	0														Dev. Std.	12.098	9.48901	5.58387	3.10597	0	0	0	0	0
	Error Std	6.9848	5.47848	3.22385	1.79323	0	0	0	0	0														Error Std	6.9848	5.47848	3.22385	1.79323	0	0	0	0	0

## Sheet: Experiment 1
Extracts	Lung_CHU2
	100	50	20	2						Blank	Solvent
Blank + extract										0.126	3.539
Blank + extract										0.119	3.074
Blank + extract	0.122	0.097	0.114	0.127						0.103	3.472
Repetition 1	2.382	2.23	2.536	1.734
Repetition 2	2.33	2.527	2.608	2.933
Repetition 3	2.4	2.301	2.381	2.617
	100	50	20	2						Blank	Solvent
Lung_CHU2	100	50	20	2							Blank	Solvent
Blank + extract	0.122	0.097	0.114	0.127						Mean	0.116	3.36167
Repetition 1	2.382	2.23	2.536	1.734
Repetition 2	2.33	2.527	2.608	2.933
Repetition 3	2.4	2.301	2.381	2.617
Mean	2.37067	2.35267	2.50833	2.428
% viability	69.2821	69.4978	73.7702	70.8945
% mortality	30.7179	30.5022	26.2298	29.1055
Extracts	Lung-tulu4
	100	50	20	2						Blank	Solvent
Blank + extract										0.126	3.539
Blank + extract										0.119	3.074
Blank + extract	0.133	0.11	0.119	0.115						0.103	3.472
Repetition 1	1.93	2.277	1.716	2.857
Repetition 2	2.075	2.462	2.517	2.948
Repetition 3	2.264	2.442	2.418	3.199
	100	50	20	2						Blank	Solvent
Lung-tulu4	100	50	20	0							Blank	Solvent
Blank + extract	0.133	0.11	0.119	0.115						Mean	0.116	3.36167
Repetition 1	1.93	2.277	1.716	2.857
Repetition 2	2.075	2.462	2.517	2.948
Repetition 3	2.264	2.442	2.418	3.199
Mean	2.08967	2.39367	2.217	3.00133
% viability	60.2855	70.3605	64.64	88.9288
% mortality	39.7145	29.6395	35.36	11.0712
Extracts	vero chu2
	100	50	20	2						Blank	Solvent
Blank + extract										0.097	3.072
Blank + extract										0.101	3.079
Blank + extract	0.117	0.111	0.115	0.123						0.095	3.078
Repetition 1	3.218	3.135	3.183	3.217
Repetition 2	3.373	3.147	3.23	3.255
Repetition 3	3.199	3.087	3.174	3.324
	100	50	20	2						Blank	Solvent
vero chu2	100	50	20	2							Blank	Solvent
Blank + extract	0.117	0.111	0.115	0.123						Mean	0.0976667	3.07633
Repetition 1	3.218	3.135	3.183	3.217
Repetition 2	3.373	3.147	3.23	3.255
Repetition 3	3.199	3.087	3.174	3.324
Mean	3.26333	3.123	3.19567	3.26533
% viability	105.629	101.119	103.424	105.495
% mortality	-5.62892	-1.11907	-3.42435	-5.49463
Extracts	vero-tulu4
	100	50	20	2						Blank	Solvent
Blank + extract										0.097	3.072
Blank + extract										0.101	3.079
Blank + extract	0.114	0.113	0.124	0.117						0.095	3.078
Repetition 1	3.333	2.99	3.187	3.388
Repetition 2	3.436	3.385	3.258	3.295
Repetition 3	3.338	3.363	3.406	3.604
	100	50	20	2						Blank	Solvent
vero-tulu4	100	50	20	2							Blank	Solvent
Blank + extract	0.114	0.113	0.124	0.117						Mean	0.0976667	3.07633
Repetition 1	3.333	2.99	3.187	3.388
Repetition 2	3.436	3.385	3.258	3.295
Repetition 3	3.338	3.363	3.406	3.604
Mean	3.369	3.246	3.28367	3.429
% viability	109.277	105.181	106.077	111.191
% mortality	-9.27708	-5.18129	-6.07654	-11.1907

## Sheet: Experiment 2
Extracts	Lung_CHU2
	100	50	20	2						Blank	Solvent
Blank + extract										0.186	3.555
Blank + extract										0.113	3.614
Blank + extract	0.113	0.13	0.11	0.136						0.117	3.285
Repetition 1	2.199	2.297	1.939	2.772
Repetition 2	1.99	2.372	1.538	2.741
Repetition 3	2.042	2.257	2.273	2.757
	100	50	20	2						Blank	Solvent
Lung_CHU2	100	50	20	2	0	0	0	0	0		Blank	Solvent
Blank + extract	0.113	0.13	0.11	0.136						Mean	0.138667	3.48467
Repetition 1	2.199	2.297	1.939	2.772
Repetition 2	1.99	2.372	1.538	2.741
Repetition 3	2.042	2.257	2.273	2.757
Mean	2.077	2.30867	1.91667	2.75667
% viability	58.697	65.1126	53.9948	78.3224
% mortality	41.303	34.8874	46.0052	21.6776
Extracts	Lung-tulu4
	100	50	20	0						Blank	Solvent
Blank + extract										0.186	3.555
Blank + extract										0.113	3.614
Blank + extract	0.11	0.127	0.142	0.14						0.117	3.285
Repetition 1	1.882	2.081	1.668	2.803
Repetition 2	2.146	2.443	2.394	3.109
Repetition 3	1.849	2.347	1.678	3.251
	100	50	20	0						Blank	Solvent
Lung-tulu4	100	50	20	2							Blank	Solvent
Blank + extract	0.11	0.127	0.142	0.14						Mean	0.138667	3.48467
Repetition 1	1.882	2.081	1.668	2.803
Repetition 2	2.146	2.443	2.394	3.109
Repetition 3	1.849	2.347	1.678	3.251
Mean	1.959	2.29033	1.91333	3.05433
% viability	55.26	64.6543	52.9388	87.099
% mortality	44.74	35.3457	47.0612	12.901
Extracts	vero chu2
	100	50	20	2						Blank	Solvent
Blank + extract										0.091	3.174
Blank + extract										0.102	3.14
Blank + extract	0.131	0.108	0.118	0.124						0.095	3.147
Repetition 1	2.892	3.156	3.142	3.143
Repetition 2	3.08	3.214	3.173	3.228
Repetition 3	3.013	3.054	3.048	3.022
	100	50	20	2						Blank	Solvent
vero chu2	100	50	20	2							Blank	Solvent
Blank + extract	0.131	0.108	0.118	0.124						Mean	0.096	3.15367
Repetition 1	2.892	3.156	3.142	3.143
Repetition 2	3.08	3.214	3.173	3.228
Repetition 3	3.013	3.054	3.048	3.022
Mean	2.995	3.14133	3.121	3.131
% viability	93.6662	99.2042	98.2121	98.343
% mortality	6.33381	0.795814	1.78786	1.65704
Extracts	vero-tulu4
	100	50	20	2						Blank	Solvent
Blank + extract										0.091	3.174
Blank + extract										0.102	3.14
Blank + extract	0.135	0.122	0.117	0.119						0.095	3.147
Repetition 1	2.889	3.051	3.174	3.135
Repetition 2	2.984	2.886	3.245	3.443
Repetition 3	3.128	3.145	3.486	3.485
	100	50	20	2						Blank	Solvent
vero-tulu4	100	50	20	2							Blank	Solvent
Blank + extract	0.135	0.122	0.117	0.119						Mean	0.096	3.15367
Repetition 1	2.889	3.051	3.174	3.135
Repetition 2	2.984	2.886	3.245	3.443
Repetition 3	3.128	3.145	3.486	3.485
Mean	3.00033	3.02733	3.30167	3.35433
% viability	93.7098	95.018	104.153	105.811
% mortality	6.2902	4.98201	-4.15349	-5.81053

## Sheet: Experiment 3
Extracts	Lung_CHU2
	100	50	20	2						Blank	Solvent
Blank + extract										0.105	3.083
Blank + extract										0.115	2.937
Blank + extract	0.164	0.14	0.105	0.102						0.111	3.199
Repetition 1	1.976	2.341	2.413	3.282
Repetition 2	2.358	2.397	2.578	2.948
Repetition 3	2.238	2.31	2.524	3.152
	100	50	20	2						Blank	Solvent
Lung_CHU2	100	50	20	2							Blank	Solvent
Blank + extract	0.164	0.14	0.105	0.102						Mean	0.110333	3.073
Repetition 1	1.976	2.341	2.413	3.282
Repetition 2	2.358	2.397	2.578	2.948
Repetition 3	2.238	2.31	2.524	3.152
Mean	2.19067	2.34933	2.505	3.12733
% viability	68.4068	74.5725	81.0081	102.115
% mortality	31.5932	25.4275	18.9919	-2.11521
Extracts	Lung-tulu4
	100	50	20	2						Blank	Solvent
Blank + extract										0.105	3.083
Blank + extract										0.115	2.937
Blank + extract	0.138	0.129	0.112	0.139						0.111	3.199
Repetition 1	2.235	2.4	1.924	3.095
Repetition 2	1.968	1.563	2.814	3.484
Repetition 3	1.836	1.389	2.775	3.7
	100	50	20	2						Blank	Solvent
Lung-tulu4	100	50	20	2							Blank	Solvent
Blank + extract	0.138	0.129	0.112	0.139						Mean	0.110333	3.073
Repetition 1	2.235	2.4	1.924	3.095
Repetition 2	1.968	1.563	2.814	3.484
Repetition 3	1.836	1.389	2.775	3.7
Mean	2.013	1.784	2.50433	3.42633
% viability	63.2876	55.8618	80.7493	110.959
% mortality	36.7124	44.1382	19.2507	-10.9586
Extracts	vero chu2
	100	50	20	2						Blank	Solvent
Blank + extract										0.104	3.544
Blank + extract										0.107	3.632
Blank + extract	0.124	0.128	0.132	0.136						0.102	3.427
Repetition 1	2.807	3.164	3.188	3.415
Repetition 2	3.134	3.097	3.244	3.582
Repetition 3	3.13	3.129	3.158	3.585
	100	50	20	2						Blank	Solvent
vero chu2	100	50	20	2							Blank	Solvent
Blank + extract	0.124	0.128	0.132	0.136						Mean	0.104333	3.53433
Repetition 1	2.807	3.164	3.188	3.415
Repetition 2	3.134	3.097	3.244	3.582
Repetition 3	3.13	3.129	3.158	3.585
Mean	3.02367	3.13	3.19667	3.52733
% viability	84.5384	87.5219	89.3489	98.8727
% mortality	15.4616	12.4781	10.6511	1.12731
Extracts	vero-tulu4
	100	50	20	2						Blank	Solvent
Blank + extract										0.104	3.544
Blank + extract										0.107	3.632
Blank + extract	0.11	0.114	0.119	0.127						0.102	3.427
Repetition 1	2.789	2.87	3.367	3.542
Repetition 2	3.039	3.074	3.473	3.763
Repetition 3	3.295	3.27	3.353	3.964
	100	50	20	2						Blank	Solvent
vero-tulu4	100	50	20	2							Blank	Solvent
Blank + extract	0.11	0.114	0.119	0.127						Mean	0.104333	3.53433
Repetition 1	2.789	2.87	3.367	3.542
Repetition 2	3.039	3.074	3.473	3.763
Repetition 3	3.295	3.27	3.353	3.964
Mean	3.041	3.07133	3.39767	3.75633
% viability	85.4519	86.2196	95.5879	105.811
% mortality	14.5481	13.7804	4.41205	-5.81147

## Sheet: Experiment 4
Extracts	Lung_CHU2
	100	50	20							Blank	Solvent
Blank + extract
Blank + extract
Blank + extract
Repetition 1
Repetition 2
Repetition 3
	100	50	20							Blank	Solvent
Lung_CHU2	100	50	20								Blank	Solvent
Blank + extract										Mean
Repetition 1
Repetition 2
Repetition 3
Mean
% viability
% mortality
Extracts	Lung-tulu4
	100	50	20							Blank	Solvent
Blank + extract
Blank + extract
Blank + extract
Repetition 1
Repetition 2
Repetition 3
	100	50	20	2						Blank	Solvent
Lung-tulu4	100	50	20	0	0	0	0	0	0		Blank	Solvent
Blank + extract										Mean
Repetition 1
Repetition 2
Repetition 3
Mean
% viability
% mortality
Extracts	vero chu2
	100	50	20							Blank	Solvent
Blank + extract
Blank + extract
Blank + extract
Repetition 1
Repetition 2
Repetition 3
	100	50	20							Blank	Solvent
vero chu2	100	50	20	2							Blank	Solvent
Blank + extract										Mean
Repetition 1
Repetition 2
Repetition 3
Mean
% viability
% mortality
Extracts	vero-tulu4
	100	50	20	2						Blank	Solvent
Blank + extract
Blank + extract
Blank + extract
Repetition 1
Repetition 2
Repetition 3
	100	50	20	2						Blank	Solvent
vero-tulu4	100	50	20	2							Blank	Solvent
Blank + extract										Mean
Repetition 1
Repetition 2
Repetition 3
Mean
% viability
% mortality

## Sheet: Experiment 5
Extracts
	100	50	20	2						Blank	Solvent
Blank + extract
Blank + extract
Blank + extract
Repetition 1
Repetition 2
Repetition 3
	100	50	20	2						Blank	Solvent
0	100	50	20	2							Blank	Solvent
Blank + extract										Mean
Repetition 1
Repetition 2
Repetition 3
Mean
% viability
% mortality
Extracts	Lung-tulu4
	100	50	20	2						Blank	Solvent
Blank + extract
Blank + extract
Blank + extract
Repetition 1
Repetition 2
Repetition 3
	100	50	20	2						Blank	Solvent
Lung-tulu4	100	50	20	2							Blank	Solvent
Blank + extract										Mean
Repetition 1
Repetition 2
Repetition 3
Mean
% viability
% mortality
Extracts	vero chu2
	100	50	20	2						Blank	Solvent
Blank + extract
Blank + extract
Blank + extract
Repetition 1
Repetition 2
Repetition 3
	100	50	20	2						Blank	Solvent
vero chu2	100	50	20	2							Blank	Solvent
Blank + extract										Mean
Repetition 1
Repetition 2
Repetition 3
Mean
% viability
% mortality
Extracts	vero-tulu4
	100	50	20	2						Blank	Solvent
Blank + extract
Blank + extract
Blank + extract
Repetition 1
Repetition 2
Repetition 3
	100	50	20	2						Blank	Solvent
vero-tulu4	100	50	20	2							Blank	Solvent
Blank + extract										Mean
Repetition 1
Repetition 2
Repetition 3
Mean
% viability
% mortality
